# Supplementary material for: Carbogenically coated silica nanoparticles and their forensic applications
Source: Royal Society of Chemistry journal article supplement (doi:10.1039/c6cc02556k), 2016-01-01
Supplement: c6cc02556k1.pdf [file c6cc02556k1.pdf]

## Supplementary information

### Carbogenically coated silica nanoparticles and their forensic applications

**D. Fernandes<sup>a</sup>, M. J. Krysmann<sup>b</sup>, A. Kelarakis<sup>a\*</sup>**

<sup>a</sup>Centre for Materials Science, School of Physical Sciences and Computing, University of Central Lancashire, Preston PR12HE, U.K.

<sup>b</sup>School of Pharmacy and Biosciences, University of Central Lancashire, Preston PR12HE, U.K.

email: [akelarakis@uclan.ac.uk](mailto:akelarakis@uclan.ac.uk), tel: 004417724172

### Experimental Section

#### *Synthesis and characterization of C-SiO<sub>2</sub>*

3 ml of colloidal silica nanoparticles (Ludox HS 30 from Sigma-Aldrich) with a mean diameter of 18 nm were treated with 3g of Dimethyloctadecyl[3-(trimethoxysilyl)propyl]ammonium chloride (Sigma-Aldrich), in acidic media (1 ml of 1M HCl) at 60 °C for 10 min. The dispersion was neutralized with 0.1 M NaOH, was left for 24h at room temperature and was dialyzed against deionized water using snakeskin pleated dialysis tubing membrane with a molecular weight cut-off of 3500 Da. TGA characterization (Mettler Toledo TGA 1 STAR system) under nitrogen atmosphere and heating rate 10 °C/min indicate that the surface-modified silica nanoparticles have 34 wt% organic content. Subsequently, the nanoparticles were pyrolysed at 250 °C for 3h before being subjected to surface oxidation via HNO<sub>3</sub> (3M) at 100 °C and dialysis against water. Finally, the C-SiO<sub>2</sub> were treated with ethylene diamine (Sigma-Aldrich) at 80 °C for 1h followed by dialysis.

*Elemental analysis* (Flash 2000 CHNS-O Analyzer calibrated using methionine) of C-SiO<sub>2</sub> thus received suggests the presence of 26% C, along with minor amounts of H and N (4 and 5%, respectively).

*Fourier Transform Infra-Red (FTIR)* spectra were recorded using a Nicolet IR2000 spectrophotometer (32 scans from 3500-700 cm<sup>-1</sup> with a resolution of 8 cm<sup>-1</sup>).

### *Fluorescence imaging*

The fluorescence microscopy images were obtained using a Zeiss Axio Scope A1 microscope equipped with band-pass filters. Three excitation wavelengths were used with 350, 395 and 590 nm.

*Transmission Electron Microscopy (TEM)* images were obtained by A FEI T12 Spirit operated at 120 kV. A droplet of a dilute suspension (0.05mg/mL in water) was deposited on a carbon coated copper grid (Agar Scientific, USA) and dried under air.

*Scanning Electron Microscopy (SEM)*. The microstructure of the nanotags generated on a sticky SEM pad was investigated using a FEI Quanta 200.

*Photoluminescence spectra* of 13 mg/ml aqueous dispersion of C-SiO<sub>2</sub> under different excitation wavelengths were recorded at room temperature using a Horiba Jobin Yvon FluoroMax-4 spectrofluorometer.

*Dynamic Light Scattering*. The hydrodynamic diameter of C-SiO<sub>2</sub> of the nanoparticles were measured on well-filtered suspensions (Nylon membrane filters with porosity 0.45 μm) using a Malvern Zetasizer Nano-ZS (Malvern Instruments, England) package which includes a 4 mW He-Ne laser operating at  $\lambda=633$  nm.

### *Fingerprint collection and development*

A squirrel-hair brush was used to apply the powders to fingerprints deposited on a variety of surfaces. In the first stage, one fingermark donor was used and the results were later confirmed using a pool of two more donors. The donors' hands were washed thoroughly, and then the right index finger was rubbed on the forehead as to have both eccrine and sebaceous sweat. The marks were developed 24 h after their deposition. Natural fingerprints were also collected and the results (not shown here) were similar to those observed for the charged ones. The standard white fingerprint powder (WFP) was obtained from Crime Scene Investigation (Instant white Powder). The fluorescent fingerprint powder was obtained from Foster and Freeman.

## Figures

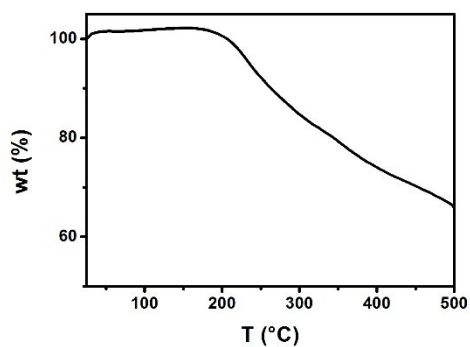

**S.I. Figure 1.** TGA thermograph of the surface treated silica nanoparticles before carbonization.

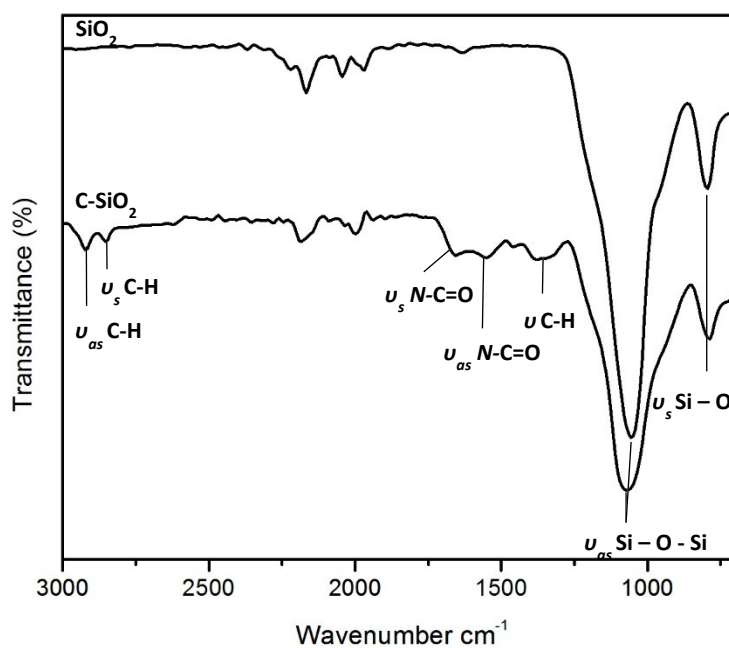

**S.I. Figure 2.** FTIR spectra of the colloidal SiO<sub>2</sub> and C-SiO<sub>2</sub>. ( $\nu_s$  and  $\nu_{as}$  stand for symmetric and anti-symmetric stretching vibration, respectively).

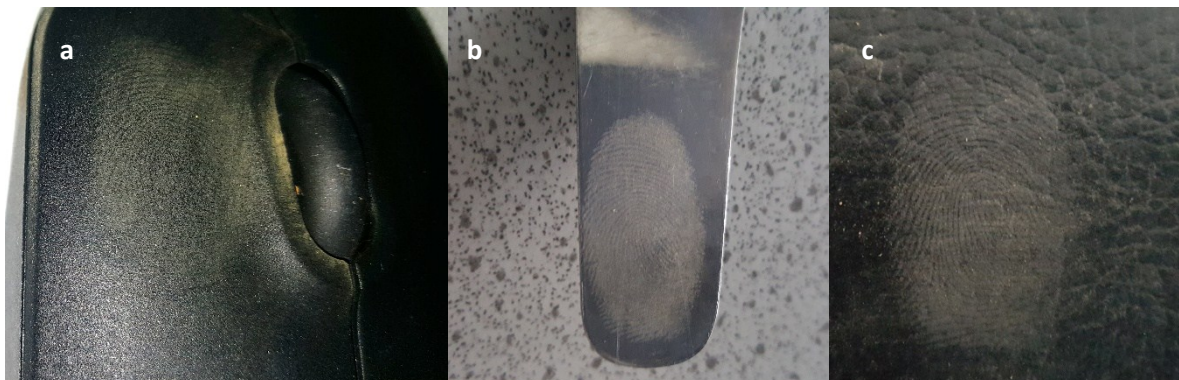

**S.I. Figure 3.** Fingerprints developed with C-SiO<sub>2</sub> nanoparticles on various surfaces: (a) computer mouse, metallic spatula and (c) a rough plastic surface. The images were captured under white light.

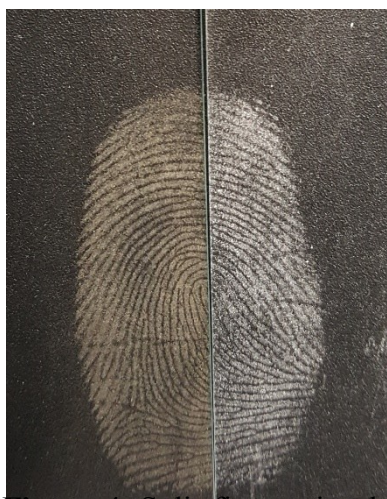

**S.I. Figure 4.** Split fingerprint developed with C-SiO<sub>2</sub> nanoparticles (left half) commercial WFP (right half). The image was captured under white light.

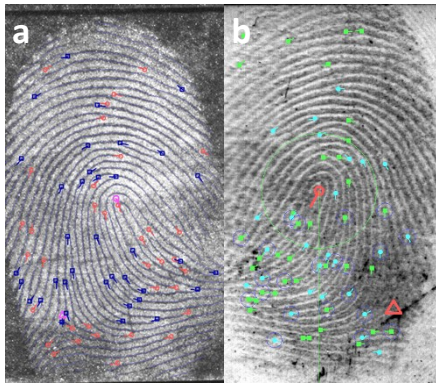

**S.I. Figure 5.** AFIS analysis of a fingerprint developed with (a) C-SiO<sub>2</sub> nanoparticles and (b) commercial WFP showing 73 and 65 minutiae, respectively.

|        |        |        |        |        |        |
|--------|--------|--------|--------|--------|--------|
| Laser  | 365 nm | 410 nm | 445 nm | 475 nm | 520 nm |
| Filter | 400 nm | 455 nm | 455 nm | 495 nm | 530 nm |

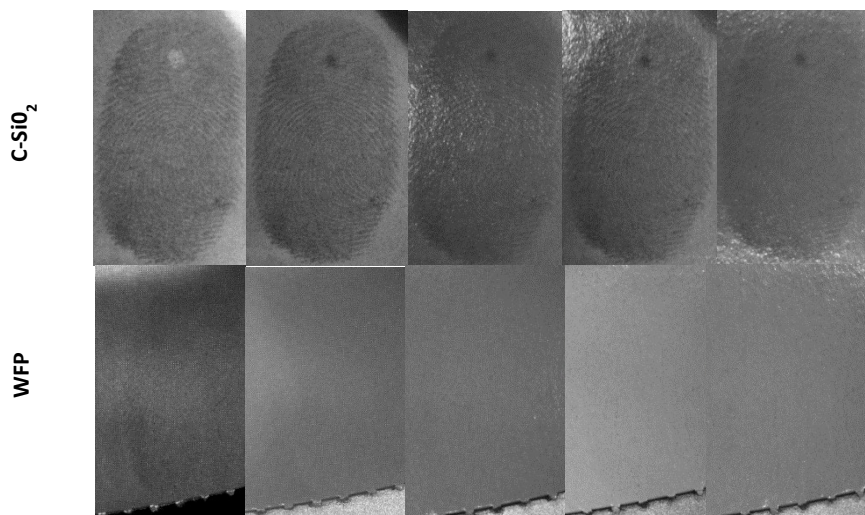

**S.I. Figure 6.** Comparison between the C-SiO<sub>2</sub> (upper images) and a commercial instant white fingerprint powder on a glass slide investigated on a crime lite imager.

|        |        |        |        |        |        |        |
|--------|--------|--------|--------|--------|--------|--------|
| Laser  | 365 nm | 410 nm | 445 nm | 475 nm | 520 nm | 590 nm |
| Filter | 400 nm | 455 nm | 455 nm | 495 nm | 530 nm | 610 nm |

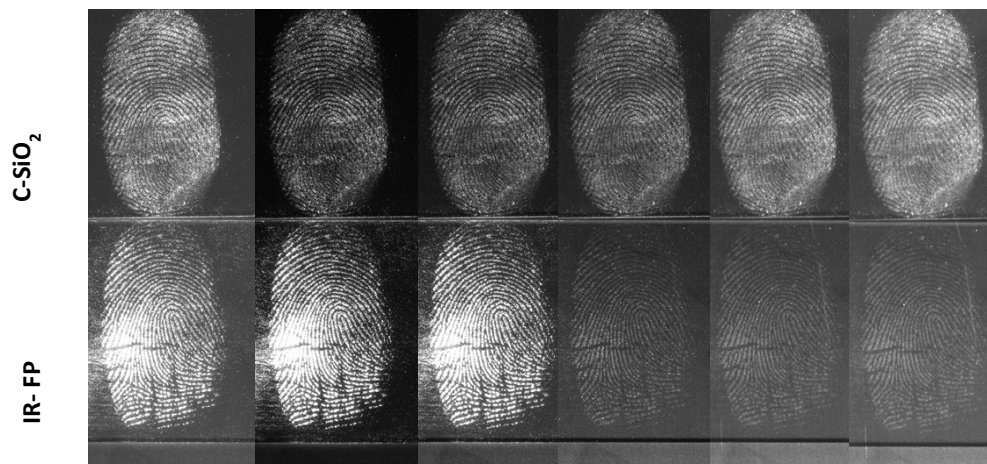

**S.I. Figure 7.** Comparison between the C-SiO<sub>2</sub> (upper images) and a commercial fluorescent fingerprint powder on a glass slide investigated on a crime lite imager.

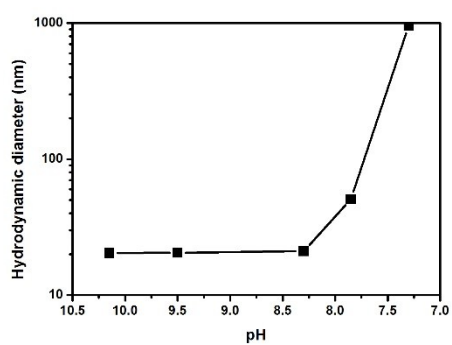

**S.I. Figure 8.** Hydrodynamic diameter of 0.1 wt% C-SiO<sub>2</sub> in water as a function of pH.

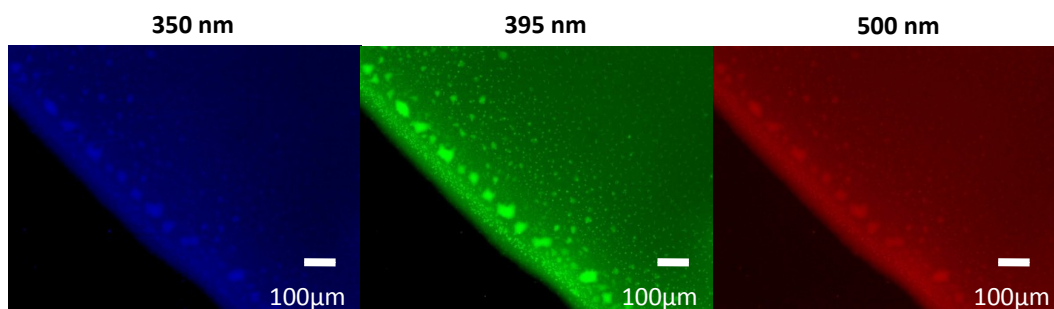

**S.I. Figure 9.** Fluorescence microscopy images (under three excitation wavelengths) of air-dried aqueous dispersions of C-SiO<sub>2</sub> with pH=10, indicating the absence of structured PL motives, in strong contrast to the behavior observed when pH=7.

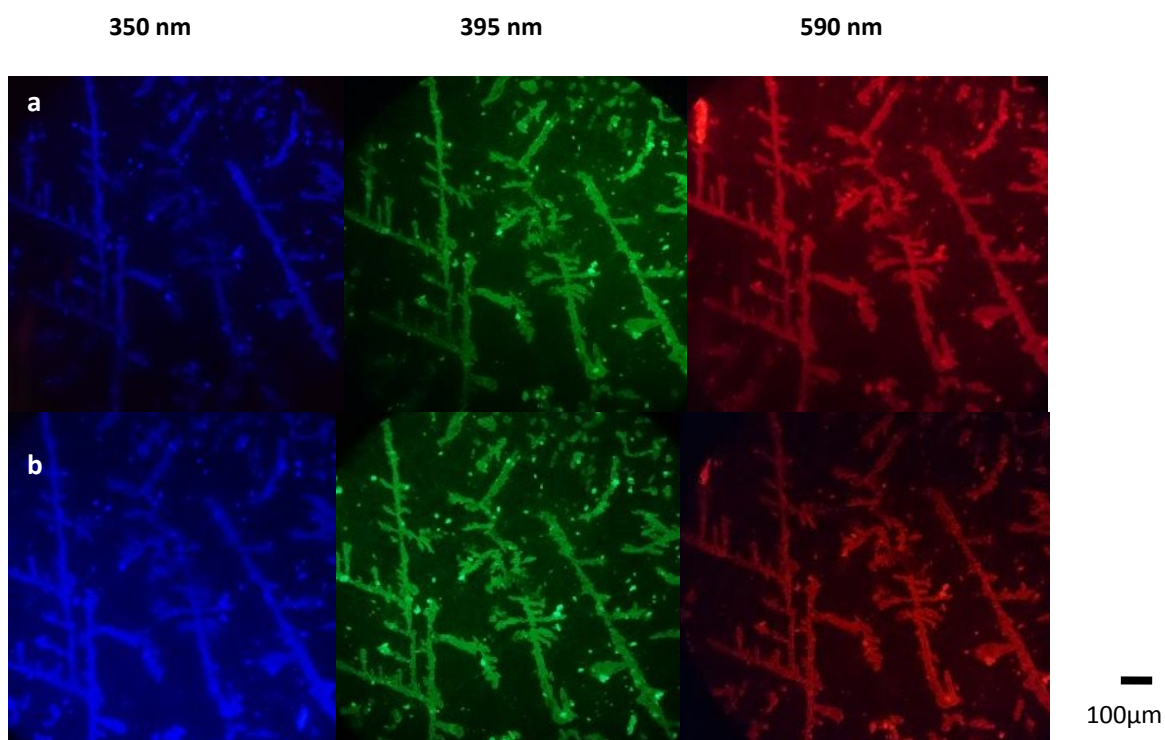

**S.I. Figure 10.** Fluorescence microscopy images (under three different excitation wavelengths) of self-assembled motives of C-SiO<sub>2</sub> generated on a glass surface before (a) and after (b) being heated to 100°C for several hours.
